## Time-dependent improvement in coronary flow reserve in collateral donor artery following successful recanalization of the Coronary Chronic Total Occlusion

M. Dobric<sup>1</sup>, B. Beleslin<sup>1</sup>, M. Tesic<sup>1</sup>, A. Djordjevic Dikic<sup>1</sup>, S. Stojkovic<sup>1</sup>, V. Giga<sup>1</sup>, M. Tomasevic<sup>1</sup>, I. Jovanovic<sup>1</sup>, O. Petrovic<sup>1</sup>, J. Rakocevic<sup>2</sup>, N. Boskovic<sup>2</sup>, G. Stankovic<sup>1</sup>, V. Vukcevic<sup>1</sup>, M.A. Nedeljkovic<sup>1</sup>, M. Ostojic<sup>2</sup>

<sup>1</sup>Clinical Center of Serbia, Clinic for Cardiology, Belgrade, Serbia; <sup>2</sup>University of Belgrade, School of Medicine, Belgrade, Serbia

**Funding Acknowledgement:** Type of funding source: None

**Background:** Coronary chronic total occlusion (CTO) is characterized by the presence of collateral blood vessels which can provide additional blood supply to CTO-artery dependent myocardium. Successful CTO recanalization is followed by significant decrease in collateral donor artery blood flow and collateral derecruitment.

**Purpose:** Study aim was to assess time-dependent changes in coronary flow reserve (CFR) in collateral donor artery after CTO recanalization and identify factors that influence these changes.

**Methods:** Our study enrolled 31 patients with CTO scheduled for percutaneous coronary intervention (PCI). Non-invasive CFR was measured before PCI in collateral donor artery, and 24h and 6 months post-PCI in CTO and collateral donor artery. Gated SPECT MIBI was performed before PCI, while quality of life was assessed by Seattle angina questionnaire (SAQ) pre-PCI, and 6 months after PCI.

**Results:** Collateral donor artery showed significant increase in CFR 24h after CTO recanalization compared to pre-PCI values ( $2.30 \pm 0.49$  vs.  $2.71 \pm 0.45$ ,  $p=0.005$ ), which remained unchanged after 6 months

( $2.68 \pm 0.24$ ). Maximum baseline blood flow velocity of the collateral donor artery showed significant decrease measured 24h post-PCI compared to pre-PCI values ( $0.28 \pm 0.06$  vs.  $0.24 \pm 0.04$ m/s), and remained similar after 6-months. There was no significant difference in maximum hyperemic blood flow velocity pre-PCI, 24h and 6 months post-PCI. CFR change of the collateral donor artery 24h post-PCI compared to pre-PCI values showed inverse correlation with left ventricle ejection fraction (LVEF) measured on SPECT. CFR changes showed no correlation with the changes in quality of life assessed by SAQ post-PCI compared to pre-PCI.

**Conclusions:** Significant increase in CFR of the collateral donor artery was observed within 24h after successful recanalization of CTO artery, which maintained constant after the 6 months follow-up. This increase was largely driven by the significant reduction in the maximum baseline blood flow velocity within 24h after CTO recanalization compared to pre-PCI values. Our results suggest that possible benefit of CTO recanalization could be the improvement in physiology of the collateral donor artery.
